# Supplementary material for: The global prevalence of essential tremor, with emphasis on age and sex: A meta-analysis
Source: J Glob Health. 2021 Apr 10;11:04028. doi: 10.7189/jogh.11.04028 (PMC8035980; doi:10.7189/jogh.11.04028)
Supplement: Online Supplementary Document [file jogh-11-04028-s001.pdf]

## **Supplementary Appendix**

**Song et al. The global prevalence of essential tremor, with emphasis on age and sex: a meta-analysis**

**Table S1.** Search strategy to identify studies reporting the prevalence of essential tremor in the general population

**Table S2.** The time lag between investigation and publication in the included articles reporting the prevalence of essential tremor in the general population (n=29)

**Table S3.** Quality assessment scale for rating the risk of bias

**Table S4.** Detailed characteristics of the included articles (n=29)

**Table S5.** Quality scores for assessing the risk of bias in the included articles (n=29)

This supplementary material has been provided by the authors to give readers additional information about their work.

**Table S1. Search strategy to identify studies reporting the prevalence of essential tremor in the general population**

| <b>Database</b>              | <b>Access date</b>         | <b>Search terms</b>                                                                                                                                                                        |                                                                                                                    |
|------------------------------|----------------------------|--------------------------------------------------------------------------------------------------------------------------------------------------------------------------------------------|--------------------------------------------------------------------------------------------------------------------|
| <b>PubMed</b>                | 21 <sup>st</sup> Dec, 2019 | (Essential Tremor [Title/Abstract]) AND (prevalence[Title/Abstract] OR epidemiology[Title/Abstract]) AND ("2000/01/01"[Date - Publication] : "3000"[Date - Publication])<br>Filter: Humans |                                                                                                                    |
| <b>MEDLINE (1950-)</b>       | 21 <sup>st</sup> Dec, 2019 | 1                                                                                                                                                                                          | exp Essential Tremor/                                                                                              |
|                              |                            | 2                                                                                                                                                                                          | Essential Tremor.ab,ti.                                                                                            |
|                              |                            | 3                                                                                                                                                                                          | (prevalen* or epidemiolog*).ab,ti.                                                                                 |
|                              |                            | 4                                                                                                                                                                                          | 1 or 2                                                                                                             |
|                              |                            | 5                                                                                                                                                                                          | 3 and 4                                                                                                            |
|                              |                            | 6                                                                                                                                                                                          | limit 5 to (humans and yr="2000 -Current" and medline)                                                             |
| <b>EMBASE (1980-)</b>        | 21 <sup>st</sup> Dec, 2019 | 1                                                                                                                                                                                          | exp essential tremor/                                                                                              |
|                              |                            | 2                                                                                                                                                                                          | Essential Tremor.ab,ti.                                                                                            |
|                              |                            | 3                                                                                                                                                                                          | (prevalen* or epidemiolog*).ab,ti.                                                                                 |
|                              |                            | 4                                                                                                                                                                                          | 1 or 2                                                                                                             |
|                              |                            | 5                                                                                                                                                                                          | 3 and 4                                                                                                            |
|                              |                            | 6                                                                                                                                                                                          | limit 5 to (human and embase and yr="2000 -Current" and (article or article in press or short survey) and journal) |
| <b>Global Health (1973-)</b> | 21 <sup>st</sup> Dec, 2019 | 1                                                                                                                                                                                          | Essential Tremor.ab,ti.                                                                                            |
|                              |                            | 2                                                                                                                                                                                          | (prevalen* or epidemiolog*).ab,ti.                                                                                 |
|                              |                            | 3                                                                                                                                                                                          | 1 and 2                                                                                                            |
|                              |                            | 4                                                                                                                                                                                          | limit 3 to yr="2000 -Current"                                                                                      |

**Table S2. The time lag between investigation and publication in the included articles reporting the prevalence of essential tremor in the general population (n=29)**

| Study ID           | Author(s)                | Year of publication | Year of investigation | Time-lag (year) |
|--------------------|--------------------------|---------------------|-----------------------|-----------------|
| 1 <sup>[1]</sup>   | Bergareche A, et al.     | 2001                | NS                    |                 |
| 2 <sup>[2]</sup>   | Benito-León J, et al.    | 2003                | 1994                  | 9               |
| 3 <sup>[3]</sup>   | Dogu O, et al.           | 2003                | 2002                  | 1               |
| 4 <sup>[4]</sup>   | Louis ED, et al.         | 2003                | 1998.5                | 4.5             |
| 5 <sup>[5]</sup>   | Dogu O, et al.           | 2004                | NS                    |                 |
| 6 <sup>[6]</sup>   | Tan LCS, et al.          | 2005                | 2002                  | 3               |
| 7 <sup>[7]</sup>   | Inzelberg R, et al.      | 2006                | 2003                  | 3               |
| 8 <sup>[8]</sup>   | Sun H, et al.            | 2006                | 2000                  | 6               |
| 9 <sup>[9]</sup>   | Mancini ML, et al.       | 2007                | NS                    |                 |
| 10 <sup>[10]</sup> | Das SK, et al.           | 2008                | 2003                  | 5               |
| 11 <sup>[11]</sup> | Dotchin CL, et al.       | 2008                | 2005                  | 3               |
| 12 <sup>[12]</sup> | Das SK, et al.           | 2009                | 2003                  | 6               |
| 13 <sup>[13]</sup> | Erer S, et al.           | 2009                | 2004                  | 5               |
| 14 <sup>[14]</sup> | Glik A, et al.           | 2009                | NS                    |                 |
| 15 <sup>[15]</sup> | Kusbeci OY, et al.       | 2009                | NS                    |                 |
| 16 <sup>[16]</sup> | Louis ED, et al.         | 2009                | 2000                  | 9               |
| 17 <sup>[17]</sup> | Sur H, et al.            | 2009                | 2005                  | 4               |
| 18 <sup>[18]</sup> | Liu Y, et al.            | 2011                | 2008                  | 3               |
| 19 <sup>[19]</sup> | Aharon-Peretz J, et al.  | 2012                | NS                    |                 |
| 20 <sup>[20]</sup> | Okubadejo NU, et al.     | 2012                | 2008                  | 4               |
| 21 <sup>[21]</sup> | Barbosa MT, et al.       | 2013                | 2001.5                | 11.5            |
| 22 <sup>[22]</sup> | Ozel L, et al.           | 2013                | NS                    |                 |
| 23 <sup>[23]</sup> | Seijo-Martinez M, et al. | 2013                | 2004                  | 9               |
| 24 <sup>[24]</sup> | Oh ES, et al.            | 2014                | 2006                  | 8               |
| 25 <sup>[25]</sup> | Yani Y, et al.           | 2015                | 2015                  | 0               |
| 26 <sup>[26]</sup> | Wu Y, et al.             | 2016                | 2012                  | 4               |
| 27 <sup>[27]</sup> | Mansukhani KA, et al.    | 2018                | NS                    |                 |
| 28 <sup>[28]</sup> | Eliassen EH, et al.      | 2019                | 2017                  | 2               |
| 29 <sup>[29]</sup> | Guler S, et al.          | 2019                | 2013                  | 6               |

*Note: NS=not specific; The average time-lag between investigation and publication was 5.05 based on 21 articles with available data.*

**Table S3. Quality assessment scale for rating the risk of bias**

| Bias type                                                 | Low risk (score=2)                                                                                                                                            | Moderate risk (score=1)                                                                                                                                                                                                                                                                       | High risk (score=0)                                                                                                                               |
|-----------------------------------------------------------|---------------------------------------------------------------------------------------------------------------------------------------------------------------|-----------------------------------------------------------------------------------------------------------------------------------------------------------------------------------------------------------------------------------------------------------------------------------------------|---------------------------------------------------------------------------------------------------------------------------------------------------|
| Selection<br>(sample population)                          | 1) Sample from the general population, not a select group;<br>2) Consecutive unselected population;<br>3) Rationale for case and control selection explained. | 1) Sample selected from large population but selection criteria not defined;<br>2) Sample selection ambiguous but may be representative;<br>3) Rationale for cases and controls not explained;<br>4) Eligibility criteria not explained;<br>5) Analysis to adjust for sampling strategy bias. | 1) Highly select population making it difficult to generalise finding;<br>2) Sample selection ambiguous and sample unlikely to be representative. |
| Selection<br>(sample size)                                | 1) Sample size calculation performed and adequate.                                                                                                            | 1) Sample size calculation performed and reasons for not meeting sample size given;<br>2) Sample size calculation not performed but all eligible persons studied.                                                                                                                             | 1) Sample size estimation unclear or only sub-sample studied.                                                                                     |
| Selection<br>(participation rate)                         | 1) High response rate (>85%).                                                                                                                                 | 1) Moderate response rate (70-85%).                                                                                                                                                                                                                                                           | 1) Low response rate (<70%);<br>2) Response rate not reported.                                                                                    |
| Performance bias (outcome assessment)                     | 1) Diagnosis using consistent criteria and direct examination.                                                                                                | 1) Assessment from administrative database or register;<br>2) Assessment from hospital record or interviewer.                                                                                                                                                                                 | 1) Assessment from non-validated data or generic estimate from the overall population.                                                            |
| Performance bias (analytical methods to control for bias) | 1) Analysis appropriate for the type of sample (subgroup analysis/regression etc.).                                                                           | 1) Analysis does not account for common adjustment.                                                                                                                                                                                                                                           | 1) Data confusing.                                                                                                                                |

**Table S4. Detailed characteristics of the included articles (n=29)**

| ID               | Author (s)            | Year Published | Country       | WHO | WB   | Study setting                                                                    | Urban or rural | Investigation Date | Sampling Strategy                        | Study design        | Screened by whom                                                               | Who were examined   | Diagnosed by whom            | Definition of ET                                                                                                                                                                                                                                                                                                                                                                                                                                                                                                      | Sample size | Cases | Age range | Female proportion |
|------------------|-----------------------|----------------|---------------|-----|------|----------------------------------------------------------------------------------|----------------|--------------------|------------------------------------------|---------------------|--------------------------------------------------------------------------------|---------------------|------------------------------|-----------------------------------------------------------------------------------------------------------------------------------------------------------------------------------------------------------------------------------------------------------------------------------------------------------------------------------------------------------------------------------------------------------------------------------------------------------------------------------------------------------------------|-------------|-------|-----------|-------------------|
| 1 <sup>[1]</sup> | Bergareche A, et al.  | 2001           | Spain         | EUR | HIC  | Irun and Hondarrabia, in the north of Guipuzcoa                                  | mixed          | NS                 | Aleatory stratified sampling             | Two-phase           | Door-to-door by trained interviewers                                           | screened positive   | neurologists                 | We defined ET as a postural or kinetic tremor of the head or limbs without a recognizable cause. The tremor had to be gradual in onset, present for at least 1 year, or accompanied by family history of the same disorder if present for less than 1 year (at least one first-degree relative affected)                                                                                                                                                                                                              | 1540        | 48    | 65+       | 0.60              |
| 2 <sup>[2]</sup> | Benito-León J, et al. | 2003           | Spain         | EUR | HIC  | Margaritas in Getafe; Lista in Salamanca district; and Arévalo of Arévalo county | both           | 1994               | Proportionate stratified random sampling | Two-phase           | medically unsophisticated interviewers in subjects' homes or at nearby clinics | screened positive   | Eight trained neurologists   | Subjects were diagnosed as having ET if they had an action tremor of the head, limbs, or voice without any recognizable cause. The tremor had to be of gradual onset and either present for at least 1 year, or accompanied by a family history of the same disorder (at least one first-degree relative affected). Subjects with tremor related to alcohol withdrawal, hyperthyroidism, anxiety, Parkinson's disease, antidopaminergic drug intake, lithium therapy, or other known causes of tremor, were excluded. | 5278        | 256   | 65+       | 0.58              |
| 3 <sup>[3]</sup> | Dogu O, et al.        | 2003           | Turkey        | EUR | UMIC | Mersin                                                                           | both           | 2002/07-2002/12    | Random sampling                          | Two-phase           | Door-to-door by neurologists                                                   | all subjects        | neurologists                 | the presence of moderate or greater amplitude kinetic tremor during three or more tests or a head tremor were defined as ET.                                                                                                                                                                                                                                                                                                                                                                                          | 2253        | 89    | 40+       | 0.50              |
| 4 <sup>[4]</sup> | Louis ED, et al.      | 2003           | United States | AMR | HIC  | Pittsburgh, Forsyth County,                                                      | urban          | 1998-1999          | Clustered sampling                       | One phase+physician | Self-report                                                                    | physician diagnosis | previous physician-diagnosis | NS                                                                                                                                                                                                                                                                                                                                                                                                                                                                                                                    | 3494        | 54    | 70-103    | 0.62              |

| ID               | Author (s)          | Year Published | Country   | WHO | WB   | Study setting                                        | Urban or rural | Investigation Date | Sampling Strategy  | Study design | Screened by whom             | Who were examined | Diagnosed by whom                                             | Definition of ET                                                                                                                                                                                                                                                                                                                                                                                                                                                                                                                          | Sample size | Cases | Age range | Female proportion |
|------------------|---------------------|----------------|-----------|-----|------|------------------------------------------------------|----------------|--------------------|--------------------|--------------|------------------------------|-------------------|---------------------------------------------------------------|-------------------------------------------------------------------------------------------------------------------------------------------------------------------------------------------------------------------------------------------------------------------------------------------------------------------------------------------------------------------------------------------------------------------------------------------------------------------------------------------------------------------------------------------|-------------|-------|-----------|-------------------|
| 5 <sup>[5]</sup> | Dogu O, et al.      | 2004           | Turkey    | EUR | UMIC | Sacramento County, and Washington County<br>Mersin   | urban          | NS                 | Random sampling    | Two-phase    | Door-to-door by neurologists | all subjects      | neurologists                                                  | moderate-amplitude kinetic tremor during a minimum of 3 tests or a head tremor without signs of dystonia or Parkinson disease                                                                                                                                                                                                                                                                                                                                                                                                             | 2253        | 89    | 40+       | NS                |
| 6 <sup>[6]</sup> | Tan LCS, et al.     | 2005           | Singapore | WPR | HIC  | Ang Mo Kio, Bishan, Toa Payoh, Serangoon, and Yishun | mixed          | 2001-2003          | Clustered sampling | Three-phase  | Trained interviewers         | screened positive | a movement disorders specialist (LT) or a trained fellow (VR) | the presence of bilateral action (postural or kinetic) tremor of the hands and forearms in the absence of other neurologic signs (with the exception of the cogwheel phenomena), or the presence of isolated head tremor with no signs of dystonia                                                                                                                                                                                                                                                                                        | 14906       | 40    | 50+       | 0.54              |
| 7 <sup>[7]</sup> | Inzelberg R, et al. | 2006           | Israel    | EUR | HIC  | Arabic villages of Wadi Ara in Northern Israel       | rural          | 2003               | Clustered sampling | Two-phase    | a nurse                      | all subjects      | a neurologist                                                 | Diagnosis of definite ET required moderate oscillatory postural tremor usually present during the examination, moderate and clearly oscillatory kinetic tremor in at least one arm during four of five actions and tremor that by history interfered with ≥1 activity of daily living. The diagnosis of probable ET required a moderate, clearly oscillatory kinetic tremor usually present during examination and during four of the five actions. Possible ET required a moderate clearly oscillatory kinetic tremor during the action. | 428         | 8     | 65+       | 0.46              |

| ID                      | Author (s)         | Year Published | Country  | WHO  | WB   | Study setting                                         | Urban or rural | Investigation Date | Sampling Strategy  | Study design | Screened by whom                                                           | Who were examined | Diagnosed by whom                                                                              | Definition of ET                                                                                                                                                                                                                                                                                                                 | Sample size | Cases | Age range | Female proportion |
|-------------------------|--------------------|----------------|----------|------|------|-------------------------------------------------------|----------------|--------------------|--------------------|--------------|----------------------------------------------------------------------------|-------------------|------------------------------------------------------------------------------------------------|----------------------------------------------------------------------------------------------------------------------------------------------------------------------------------------------------------------------------------------------------------------------------------------------------------------------------------|-------------|-------|-----------|-------------------|
| 8 <sup>[8]</sup><br>1   | Sun H, et al.      | 2006           | China    | WPR  | UMIC | Beijing                                               | both           | 2000               | Clustered sampling | Two-phase    | Trained interviewers                                                       | screened positive | neurologists                                                                                   | definition in the NIH ET diagnosis criteria                                                                                                                                                                                                                                                                                      | 2835        | 135   | 55+       | 0.51              |
| 9 <sup>[9]</sup><br>1   | Mancini ML, et al. | 2007           | Italy    | EUR  | HIC  | Lake Trasimeno, in the Umbria region of central Italy | mixed          | NS                 | Clustered sampling | Two-phase    | general practitioners                                                      | all subjects      | physicians, under supervision of a neurologist and being checked by a movement disorder expert | For inclusion in the study, both major criteria were considered mandatory, whereas one or more minor criteria were used as adjuvant criteria for ET diagnosis.                                                                                                                                                                   | 13604       | 108   | 27-110    | 0.48              |
| 10 <sup>[10]</sup><br>1 | Das SK, et al.     | 2008           | India    | SEAR | LMIC | Kolkata                                               | urban          | 2003/03-2004/02    | Random sampling    | Two-phase    | a doctor who was a neurologist, a neuropsychologist and four field workers | screened positive | senior neurologists and psychiatrist                                                           | Essential tremor based on the consensus statement of the movement disorders society on tremor ( 1998). Bilateral action tremor of hands and forearms or isolated head tremor with no abnormal posture for at least three years with or without positive family history without any neurological sign except cogwheel phenomenon. | 5430        | 75    | 60+       | 0.49              |
| 11 <sup>[11]</sup><br>1 | Dotchin CL, et al. | 2008           | Tanzania | AFR  | LMIC | Hai District                                          | rural          | 2005/08            | Clustered sampling | Two-phase    | research doctor                                                            | screened positive | research doctor                                                                                | ET was diagnosed in patients with a postural or kinetic tremor of the upper limbs, and/or an isolated head tremor, with no other focal neurology                                                                                                                                                                                 | 161071      | 65    | 40-96     | NS                |
| 12 <sup>[12]</sup><br>1 | Das SK, et al.     | 2009           | India    | SEAR | LMIC | Kolkata                                               | urban          | 2003/02-2004/04    | Random sampling    | Two-phase    | field investigators                                                        | screened positive | neurologist                                                                                    | The operational definition of ET included bilateral, largely symmetric, postural or kinetic tremor involving hands and forearms that is visible and persistent; additional or isolated                                                                                                                                           | 52377       | 184   | all ages  | 0.47              |

| ID         | Author (s)         | Year Published | Country       | WHO | WB   | Study setting                                                                           | Urban or rural | Investigation Date | Sampling Strategy            | Study design | Screened by whom                                     | Who were examined | Diagnosed by whom             | Definition of ET                                                                                                                                                                                                                                                                                                                                                                                                                                                                                                                  | Sample size | Cases | Age range | Female proportion |
|------------|--------------------|----------------|---------------|-----|------|-----------------------------------------------------------------------------------------|----------------|--------------------|------------------------------|--------------|------------------------------------------------------|-------------------|-------------------------------|-----------------------------------------------------------------------------------------------------------------------------------------------------------------------------------------------------------------------------------------------------------------------------------------------------------------------------------------------------------------------------------------------------------------------------------------------------------------------------------------------------------------------------------|-------------|-------|-----------|-------------------|
| 13<br>[13] | Erer S, et al.     | 2009           | Turkey        | EUR | UMIC | Orhanga zi district                                                                     | both           | 2004/06-2005/05    | Clustered sampling           | Three-phase  | 3 family medicine and 3 neurology residents          | screened positive | movement disorder specialists | tremor of the head was considered in the absence of abnormal posturing. Essential tremor (ET), the most common adult tremor, is primarily an autosomal dominant disease characterized by postural and kinetic tremor of body parts without other neurological signs. Diagnosis of definite ET required moderate oscillatory postural tremor usually present during examination, a moderate and clearly oscillatory kinetic tremor in at least one arm during 4/5 actions and tremor that by history interfered with $\geq 1$ ADL. | 1124        | 21    | 40-95     | 0.51              |
| 14<br>[14] | Glik A, et al.     | 2009           | Israel        | EUR | HIC  | Wadi Ara Arabic villages in Norther Israel Afyon Kocatepe University School of Medicine | rural          | NS                 | Clustered sampling           | One-phase    | NS                                                   | all subjects      | neurologists                  | Subjects who had action tremor of the head, limbs or voice without recognizable causes were diagnosed as having ET.                                                                                                                                                                                                                                                                                                                                                                                                               | 918         | 7     | 65+       | 0.51              |
| 15<br>[15] | Kusbeci OY, et al. | 2009           | Turkey        | EUR | UMIC | University School of Medicine                                                           | urban          | NS                 | Clustered sampling           | Two-phase    | five medical school students who were trained for ET | screened positive | a neurology specialist        | A final diagnosis of ET was assigned when the senior neurologist confirmed a total tremor score of 5.5 or higher or rated the handwritten sentence $\geq 2$ .                                                                                                                                                                                                                                                                                                                                                                     | 221         | 6     | 17-26     | 0.53              |
| 16<br>[16] | Louis ED, et al.   | 2009           | United States | AMR | HIC  | Northern Manhattan                                                                      | urban          | 1999-2001          | Aleatory stratified sampling | Two-phase    | A trained research assistant and a general physician | all subjects      | senior neurologist            | Based on the interview and examination, each neurologist independently diagnosed the subjects as ET or normal. A final diagnosis of                                                                                                                                                                                                                                                                                                                                                                                               | 2776        | 108   | 66-102    | 0.66              |
| 17<br>[17] | Sur H, et al.      | 2009           | Turkey        | EUR | UMIC | Şile                                                                                    | rural          | 2005/05-2005/07    | Random sampling              | Two-phase    | a specialist and a resident                          | all subjects      | two neurologists              |                                                                                                                                                                                                                                                                                                                                                                                                                                                                                                                                   | 2227        | 69    | 18-104    | 0.58              |

| ID                 | Author (s)              | Year Published | Country | WHO | WB   | Study setting                                              | Urban or rural | Investigation Date | Sampling Strategy  | Study design | Screened by whom                                                                                                | Who were examined            | Diagnosed by whom                    | Definition of ET                                                                                                                                                                                                                                                                                                | Sample size | Cases | Age range | Female proportion |
|--------------------|-------------------------|----------------|---------|-----|------|------------------------------------------------------------|----------------|--------------------|--------------------|--------------|-----------------------------------------------------------------------------------------------------------------|------------------------------|--------------------------------------|-----------------------------------------------------------------------------------------------------------------------------------------------------------------------------------------------------------------------------------------------------------------------------------------------------------------|-------------|-------|-----------|-------------------|
| 18 <sup>[18]</sup> | Liu Y, et al.           | 2011           | China   | WPR | UMIC | Kashkar                                                    | both           | 2008/04-2009/07    | Clustered sampling | Two-phase    | neurologist                                                                                                     | screened positive            | a neurologist and a senior physician | NS                                                                                                                                                                                                                                                                                                              | 2834        | 184   | 55-92     | 0.51              |
| 19 <sup>[19]</sup> | Aharon-Peretz J, et al. | 2012           | Israel  | EUR | HIC  | Druze villages of the Galilee                              | rural          | NS                 | Clustered sampling | Two-phase    | medical nurse by profession and trained by a senior clinical investigator or specializing in movement disorders | screened positive            | a senior neurologist                 | Subjects were diagnosed as having ET if they reported tremor of the head, limbs, or voice without any other recognizable cause. The tremor had to be of gradual onset (i.e., slow and progressive) and had to have been present for at least 1 year or be accompanied by a family history of the same disorder. | 3980        | 27    | 60+       | 0.52              |
| 20 <sup>[20]</sup> | Okubadejo NU, et al.    | 2012           | Nigeria | AFR | LMIC | Surulere Local Government Area (LGA), Lagos State, Nigeria | urban          | 2008/03-2008/09    | Random sampling    | Two-phase    | NS                                                                                                              | screened positive            | neurologist                          | ET was diagnosed in the presence of both major criteria (bilateral action tremor of the hands and forearms or isolated head tremor without dystonia) in the absence of any other neurological signs.                                                                                                            | 3000        | 36    | all ages  | 0.44              |
| 21 <sup>[21]</sup> | Barbosa MT, et al.      | 2013           | Brazil  | AMR | UM   | BambuÍ                                                     | urban          | 2001-2002          | Clustered sampling | Two-phase    | trained interviewers                                                                                            | random sample of individuals | movement disorder-trained            | We defined and classified tremor, including enhanced physiological tremor, according to the consensus                                                                                                                                                                                                           | 1186        | 122   | 64-98     | 0.62              |

| ID              | Author (s)               | Year Published | Country | WHO | WB   | Study setting                                         | Urban or rural | Investigation Date | Sampling Strategy  | Study design | Screened by whom            | Who were examined                                                                    | Diagnosed by whom                                   | Definition of ET                                                                           | Sample size | Cases | Age range | Female proportion |
|-----------------|--------------------------|----------------|---------|-----|------|-------------------------------------------------------|----------------|--------------------|--------------------|--------------|-----------------------------|--------------------------------------------------------------------------------------|-----------------------------------------------------|--------------------------------------------------------------------------------------------|-------------|-------|-----------|-------------------|
|                 |                          |                |         |     | IC   |                                                       |                |                    |                    |              |                             | ls who screened negative in phase 1 and individuals who screened positive in phase 2 | neurologists or geriatricians                       | statement of the Movement Disorder Society (MDS) for a clinical classification of tremors. |             |       |           |                   |
| 22<br>[22]<br>] | Ozel L, et al.           | 2013           | Turkey  | EUR | UMIC | Erzurum city center                                   | urban          | NS                 | Random sampling    | Three-phase  | trained resident physicians | screened positive                                                                    | a faculty member specializing in movement disorders | NS                                                                                         | 3960        | 64    | 18-60     | 0.50              |
| 23<br>[23]<br>] | Seijo-Martinez M, et al. | 2013           | Spain   | EUR | HIC  | Arosa Island                                          | mixed          | 2004               | Clustered sampling | One phase    | NS                          | screened positive                                                                    | neurologists                                        | NS                                                                                         | 753         | 65    | 65+       | 0.58              |
| 24<br>[24]<br>] | Oh ES, et al.            | 2014           | Korea   | WPR | HIC  | Seongnam City                                         | urban          | 2005-2007          | Clustered sampling | Two-phase    | physicians                  | all subjects                                                                         | a movement disorder specialist                      | NS                                                                                         | 714         | 26    | 65-99     | 0.58              |
| 25<br>[25]<br>] | Yani Y, et al.           | 2015           | China   | WPR | UMIC | Chongwen, Yueguan g, Qingnia n and Hongqiao in Urumqi | urban          | 2015               | Random sampling    | One phase    | NS                          | screened positive                                                                    | neurologists                                        | NS                                                                                         | 5463        | 198   | 45+       | 0.48              |

| ID         | Author (s)            | Year Published | Country | WHO  | WB   | Study setting                                                                                                                   | Urban or rural | Investigation Date | Sampling Strategy  | Study design | Screened by whom              | Who were examined | Diagnosed by whom                                                               | Definition of ET                                                                                                                                                                                            | Sample size | Cases | Age range | Female proportion |
|------------|-----------------------|----------------|---------|------|------|---------------------------------------------------------------------------------------------------------------------------------|----------------|--------------------|--------------------|--------------|-------------------------------|-------------------|---------------------------------------------------------------------------------|-------------------------------------------------------------------------------------------------------------------------------------------------------------------------------------------------------------|-------------|-------|-----------|-------------------|
| 26<br>[26] | Wu Y, et al.          | 2016           | China   | WPR  | UMIC | Malu town in northwestern Shanghai the villages of Moti Vahiyal, Arnai, and Chavshala in Kaparada taluka in the Valsad district | urban          | 2011/04-2013/10    | Clustered sampling | Two-phase    | trained physicians            | screened positive | movement disorder specialists                                                   | NS                                                                                                                                                                                                          | 19614       | 60    | 50+       | 0.52              |
| 27<br>[27] | Mansukhani KA, et al. | 2018           | India   | SEAR | LMIC |                                                                                                                                 | rural          | NS                 | Clustered sampling | Two-phase    | trained volunteers            | screened positive | neurologists                                                                    | NS                                                                                                                                                                                                          | 8217        | 6     | all ages  | 0.49              |
| 28<br>[28] | Eliassen EH, et al.   | 2019           | Denmark | EUR  | HIC  | Faroe Islands                                                                                                                   | mixed          | 2016/08-2017/12    | Random sampling    | Two-phase    | NS                            | screened positive | a senior movement disorder neurologist with particular specialization in tremor | moderate or greater amplitude kinetic tremor during 3 or more activities or a head tremor in the absence of PD or another known cause [e.g., medication-induced tremor, tremor from hyperthyroidism]        | 1328        | 27    | 40+       | 0.53              |
| 29<br>[29] | Guler S, et al.       | 2019           | Turkey  | EUR  | UMIC | Edirne and its districts                                                                                                        | rural          | 2013               | Random sampling    | NS           | Clinical Evaluation Enrollees | screened positive | neurologist specializing in movement disorders                                  | participants were diagnosed with ET if they had an action tremor of the hand, head, limbs, foot or voice without any other recognizable cause. Second, the tremor had to be of gradual onset (i.e. slow and | 3008        | 173   | 30+       | 0.50              |

| ID | Author (s) | Year Published | Country | WHO | WB | Study setting | Urban or rural | Investigation Date | Sampling Strategy | Study design | Screened by whom | Who were examined | Diagnosed by whom | Definition of ET                                                                                                                                                           | Sample size | Cases | Age range | Female proportion |
|----|------------|----------------|---------|-----|----|---------------|----------------|--------------------|-------------------|--------------|------------------|-------------------|-------------------|----------------------------------------------------------------------------------------------------------------------------------------------------------------------------|-------------|-------|-----------|-------------------|
|    |            |                |         |     |    |               |                |                    |                   |              |                  |                   |                   | progressive) and (1) present for at least 1 year or (2) accompanied by a family history of the same disorder (at least one reportedly affected the first-degree relative). |             |       |           |                   |

*Note: NS=not specified; WHO=World Health Organization; WB=World Bank; HIC=high-income countries; LMIC= low- and middle-income countries; UMIC= upper middle-income countries; For articles that didn’t specify the setting of investigations (urban or rural), their settings were recorded as “mixed”.*

**Table S5. Quality scores for assessing the risk of bias in the included articles (n=29)**

| ID                 | Author(s)                | Year Published | Quality score     |             |               |                    |                    |              |
|--------------------|--------------------------|----------------|-------------------|-------------|---------------|--------------------|--------------------|--------------|
|                    |                          |                | Sample population | Sample size | Participation | Outcome assessment | Analytical methods | Total scores |
| 1 <sup>[1]</sup>   | Bergareche A, et al.     | 2001           | 2                 | 1           | 2             | 2                  | 2                  | 9            |
| 2 <sup>[2]</sup>   | Benito-León J, et al.    | 2003           | 2                 | 2           | 2             | 2                  | 1                  | 9            |
| 3 <sup>[3]</sup>   | Dogu O, et al.           | 2003           | 2                 | 2           | 2             | 2                  | 1                  | 9            |
| 4 <sup>[4]</sup>   | Louis ED, et al.         | 2003           | 2                 | 1           | 0             | 0                  | 0                  | 3            |
| 5 <sup>[5]</sup>   | Dogu O, et al.           | 2004           | 2                 | 1           | 1             | 0                  | 0                  | 4            |
| 6 <sup>[6]</sup>   | Tan LCS, et al.          | 2005           | 2                 | 2           | 2             | 2                  | 2                  | 10           |
| 7 <sup>[7]</sup>   | Inzelberg R, et al.      | 2006           | 2                 | 2           | 2             | 2                  | 1                  | 9            |
| 8 <sup>[8]</sup>   | Sun H, et al.            | 2006           | 2                 | 2           | 0             | 2                  | 1                  | 7            |
| 9 <sup>[9]</sup>   | Mancini ML, et al.       | 2007           | 2                 | 2           | 2             | 0                  | 2                  | 8            |
| 10 <sup>[10]</sup> | Das SK, et al.           | 2008           | 2                 | 2           | 2             | 1                  | 1                  | 8            |
| 11 <sup>[11]</sup> | Dotchin CL, et al.       | 2008           | 2                 | 2           | 2             | 0                  | 1                  | 7            |
| 12 <sup>[12]</sup> | Das SK, et al.           | 2009           | 2                 | 2           | 2             | 1                  | 1                  | 8            |
| 13 <sup>[13]</sup> | Erer S, et al.           | 2009           | 2                 | 2           | 2             | 2                  | 2                  | 10           |
| 14 <sup>[14]</sup> | Glik A, et al.           | 2009           | 1                 | 1           | 2             | 2                  | 1                  | 7            |
| 15 <sup>[15]</sup> | Kusbeci OY, et al.       | 2009           | 2                 | 2           | 2             | 2                  | 2                  | 10           |
| 16 <sup>[16]</sup> | Louis ED, et al.         | 2009           | 2                 | 2           | 2             | 2                  | 1                  | 9            |
| 17 <sup>[17]</sup> | Sur H, et al.            | 2009           | 2                 | 2           | 1             | 2                  | 1                  | 8            |
| 18 <sup>[18]</sup> | Liu Y, et al.            | 2011           | 2                 | 2           | 2             | 1                  | 1                  | 8            |
| 19 <sup>[19]</sup> | Aharon-Peretz J, et al.  | 2012           | 1                 | 1           | 2             | 2                  | 1                  | 7            |
| 20 <sup>[20]</sup> | Okubadejo NU, et al.     | 2012           | 1                 | 2           | 2             | 1                  | 1                  | 7            |
| 21 <sup>[21]</sup> | Barbosa MT, et al.       | 2013           | 2                 | 2           | 2             | 1                  | 1                  | 8            |
| 22 <sup>[22]</sup> | Ozel L, et al.           | 2013           | 2                 | 2           | 2             | 1                  | 1                  | 8            |
| 23 <sup>[23]</sup> | Seijo-Martinez M, et al. | 2013           | 2                 | 2           | 2             | 1                  | 2                  | 9            |
| 24 <sup>[24]</sup> | Oh ES, et al.            | 2014           | 2                 | 1           | 0             | 1                  | 1                  | 5            |
| 25 <sup>[25]</sup> | Yani Y, et al.           | 2015           | 2                 | 2           | 2             | 1                  | 2                  | 9            |
| 26 <sup>[26]</sup> | Wu Y, et al.             | 2016           | 2                 | 2           | 2             | 2                  | 2                  | 10           |
| 27 <sup>[27]</sup> | Mansukhani KA, et al.    | 2018           | 2                 | 2           | 2             | 0                  | 0                  | 6            |
| 28 <sup>[28]</sup> | Eliassen EH, et al.      | 2019           | 2                 | 2           | 2             | 1                  | 2                  | 9            |
| 29 <sup>[29]</sup> | Guler S, et al.          | 2019           | 2                 | 2           | 2             | 0                  | 0                  | 6            |

## References

- 1 Bergareche A, De La Puente E, López De Munain A, Sarasqueta C, De Arce A, Poza JJ, et al. Prevalence of essential tremor: a door-to-door survey in bidasoia, Spain. *Neuroepidemiology*. 2001;20:125-8.
- 2 Benito-León J, Bermejo-Pareja F, Morales J-M, Vega S, Molina J-A. Prevalence of essential tremor in three elderly populations of central Spain. *Mov Disord*. 2003;18:389-94.
- 3 Dogu O, Sevim S, Camdeviren H, Sasmaz T, Bugdayci R, Aral M, et al. Prevalence of essential tremor: door-to-door neurologic exams in Mersin Province, Turkey. *Neurology*. 2003;61:1804-6.
- 4 Louis ED, Fried LP, Fitzpatrick AL, Jr. Longstreth WT, Newman AB. Regional and racial differences in the prevalence of physician-diagnosed essential tremor in the United States. *Mov Disord*. 2003;18:1035-40.
- 5 Dogu O, Sevim S, Louis ED, Kaleagasi H, Aral M. Reduced body mass index in patients with essential tremor: a population-based study in the province of Mersin, Turkey. *Arch Neurol*. 2004;61:386-9.
- 6 Tan LCS, Venketasubramanian N, Ramasamy V, Gao W, Saw S-M. Prevalence of essential tremor in Singapore: a study on three races in an Asian country. *Parkinsonism Relat Disord*. 2005;11:233-9.
- 7 Inzelberg R, Mazarib A, Masarwa M, Abuful A, Strugatsky R, Friedland RF. Essential tremor prevalence is low in Arabic villages in Israel: door-to-door neurological examinations. *J Neurol*. 2006;253:1557-60.
- 8 Sun H, Chen B, Sun F, Zhang XQ, Tang Z, Liu HJ, et al. Prevalence of essential tremor in community of elderly people in Beijing. *Chin J Neurol*. 2006;39:189-92.
- 9 Mancini ML, Stracci F, Tambasco N, Sarchielli P, Rossi A, Calabresi P. Prevalence of essential tremor in the territory of Lake Trasimeno, Italy: results of a population-based study. *Mov Disord*. 2007;22:540-5.
- 10 Das SK, Biswas A, Roy J, Bose P, Roy T, Banerjee TK, et al. Prevalence of major neurological disorders among geriatric population in the metropolitan city of Kolkata. *J Assoc Physicians India*. 2008;56:175-81.
- 11 Dotchin CL, Walker RW. The prevalence of essential tremor in rural northern Tanzania. *J Neurol Neurosurg Psychiatry*. 2008;79:1107-9.
- 12 Das SK, Banerjee TK, Roy T, Raut DK, Chaudhuri A, Hazra A. Prevalence of essential tremor in the city of Kolkata, India: a house-to-house survey. *Eur J Neurol*. 2009;16:801-7.
- 13 Erer S, Zarifoglu M, Karli N, Ozcakir A, Cavdar C, Ocakoglu G. Clinical characteristics of essential and physiological tremor in Orhangazi district of Bursa, Turkey: A population based study. *J Neurol Sci*. 2009;26:120-30.
- 14 Glik A, Masarwa M, Abuful A, Deeb A, Strugatsky R, Farrer LA, et al. Essential tremor might be less frequent than Parkinson's disease in North Israel Arab villages. *Mov Disord*. 2009;24:119-22.
- 15 Kusbeci OY, Ayhan S, Bayram FB, Esenboga T, Yapa AB, Coker B, et al. The prevalence of essential tremor in Turkish Medical Students. *J Neurol Sci*. 2009;26:56-9.
- 16 Louis ED, Thawani SP, Andrews HF. Prevalence of essential tremor in a multiethnic, community-based study in northern Manhattan, New York, N.Y. *Neuroepidemiology*. 2009;32:208-14.
- 17 Sur H, İlhan S, Erdoğan H, Öztürk E, Taşdemir M, Börü UT. Prevalence of essential tremor: a door-to-door survey in Sile, Istanbul, Turkey. *Parkinsonism Relat Disord*. 2009;15:101-4.
- 18 Liu Y, Zhang X-y, Tang Y-z, He Y, Han X-H, Guo M, et al. Investigation on prevalence rate of essential tremor in population aged 55 years old and above in Kashkar, between 2008 and 2009. *Chin Med J*. 2011;91:1067-9.

- 19 Aharon-Peretz J, Badarny S, Ibrahim R, Gershoni-Baruch R, Hassoun G. Essential tremor prevalence is low in the druze population in northern Israel. *Tremor Other Hyperkinet Mov.* 2012;1.
- 20 Okubadejo NU, Bankole IA, Ojo OO, Ojini FI, Danesi MA. Prevalence of essential tremor in urban Lagos, Nigeria: a door-to-door community-based study. *BMC Neurol.* 2012;12:110-.
- 21 Barbosa MT, Caramelli P, Cunningham MCQ, Maia DP, Lima-Costa MFF, Cardoso F. Prevalence and clinical classification of tremor in elderly--a community-based survey in Brazil. *Mov Disord.* 2013;28:640-6.
- 22 Ozel L, Demir R, Ozdemir G, Ozyildirim E, Avşar U, Ulvi H, et al. Investigation of the prevalence of essential tremor in individuals aged 18-60 in Erzurum. *Acta Neurol Belg.* 2013;113:127-31.
- 23 Seijo-Martinez M, Del Rio MC, Rodriguez Alvarez JR, Suarez Prado R, Torres Salgado E, Paz Esquete J, et al. Prevalence of essential tremor on Arosa Island, Spain: A community-based, door-to-door survey. *Tremor Other Hyperkinet Mov.* 2013;1.
- 24 Oh ES, Kim J-M, Kim YE, Yun JY, Kim JS, Kim SE, et al. The prevalence of essential tremor in elderly Koreans. *J Korean Med Sci.* 2014;29:1694-8.
- 25 Yani Y, Yuling W, Xinling Y. Related factors and prevalence for the essential tremor disease of uygur residents in Hetian, Xinjiang uygur autonomous region. *Chin Med J.* 2015;95:69-72.
- 26 Wu Y, Wang X, Wang C, Sun Q, Song N, Zhou Y, et al. Prevalence and clinical features of non-motor symptoms of essential tremor in Shanghai rural area. *Parkinsonism Relat Disord.* 2016;22:15-20.
- 27 Mansukhani KA, Barretto MA, Donde SA, Wandrekar J, Nigudkar A, Nair R. Epidemiological survey of neurological diseases in a tribal population cluster in Gujarat. *Ann Indian Acad Neurol.* 2018;21:294-9.
- 28 Eliassen EH, Ferrer M, Gaini S, Louis ED, Petersen MS. Prevalence of Essential Tremor in the Faroe Islands: A Population-Based Study. *Neuroepidemiology.* 2019:227-35.
- 29 Guler S, Caylan A, Turan F, Dagdeviren N. The prevalence of essential tremor in Edirne and its counties accompanied comorbid conditions. *Neurol Res.* 2019;41:847-56.
